# Supplementary material
Source: MDPI journal article supplement (https://www.mdpi.com/2073-4395/12/7/1493)
Supplement: s1 [file s1]

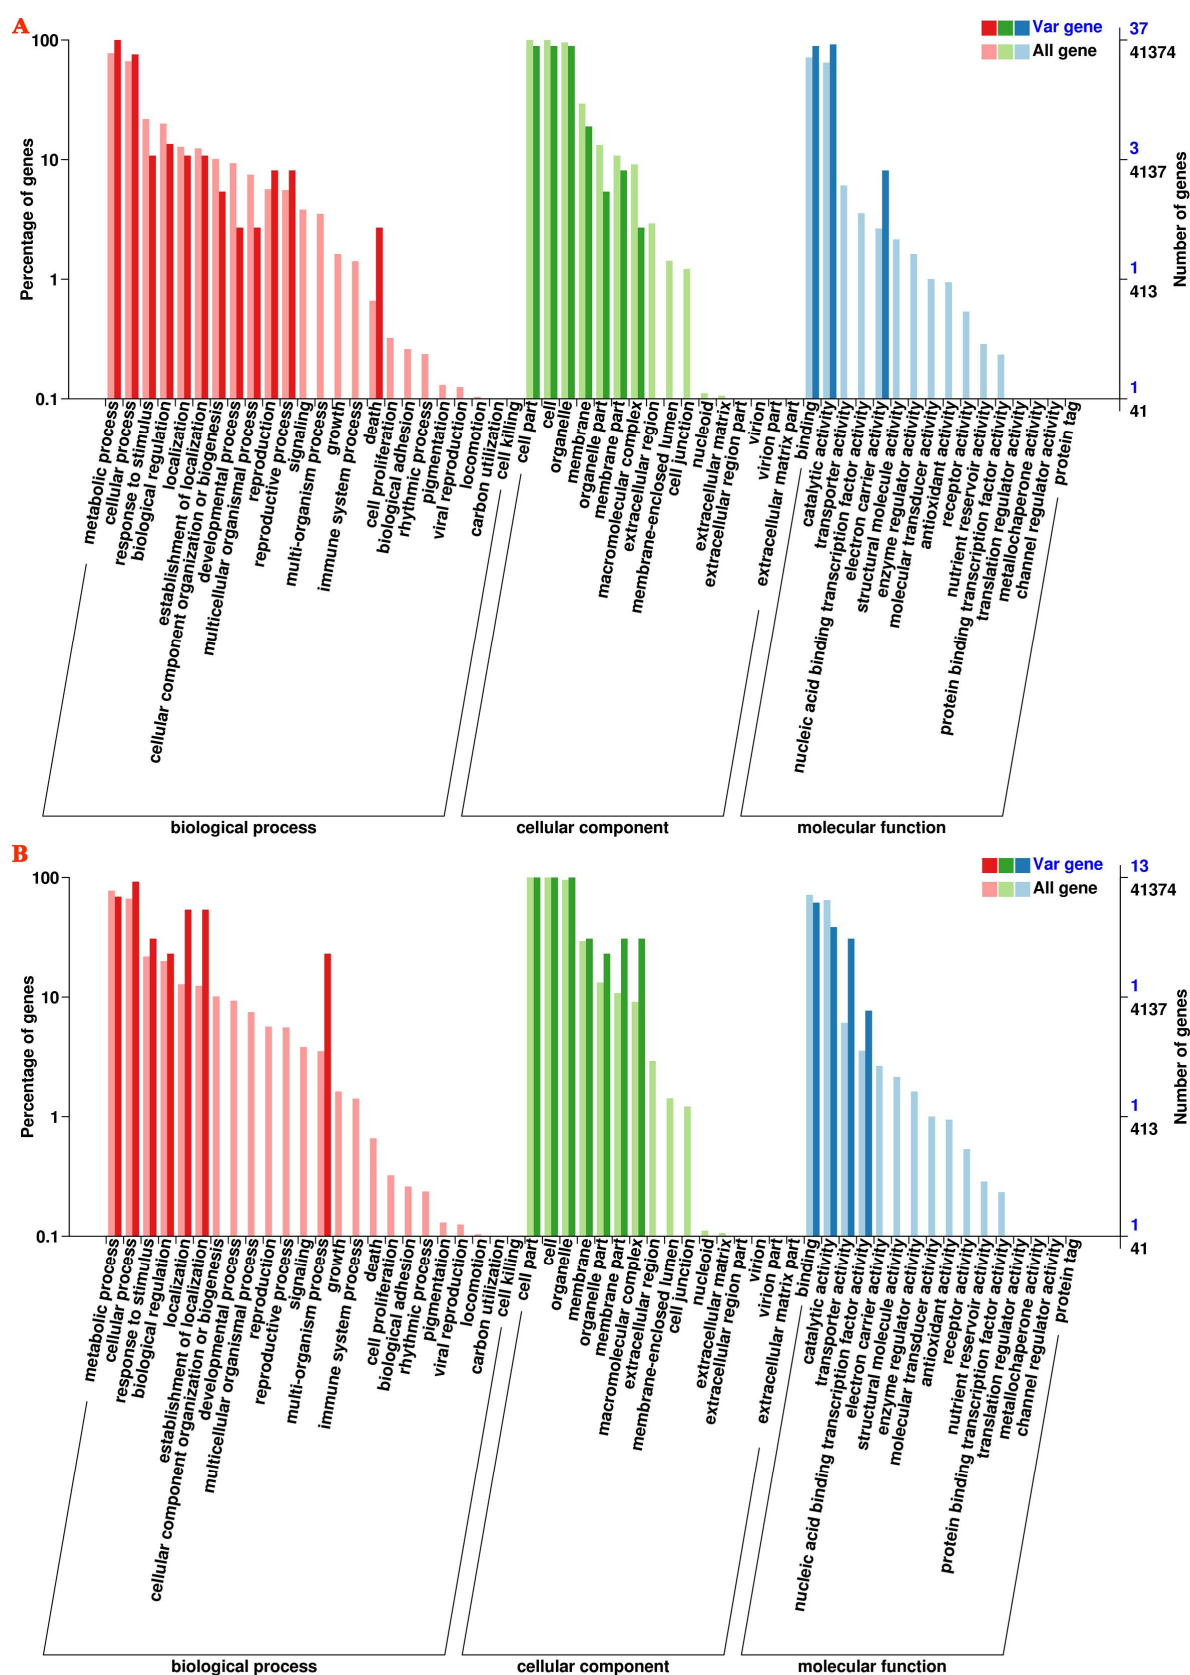

Figure S1: Gene ontology (GO) plot of the genes locating at a region of  $\pm 10$  kb near to the significant s. A. 2016; B. 2017

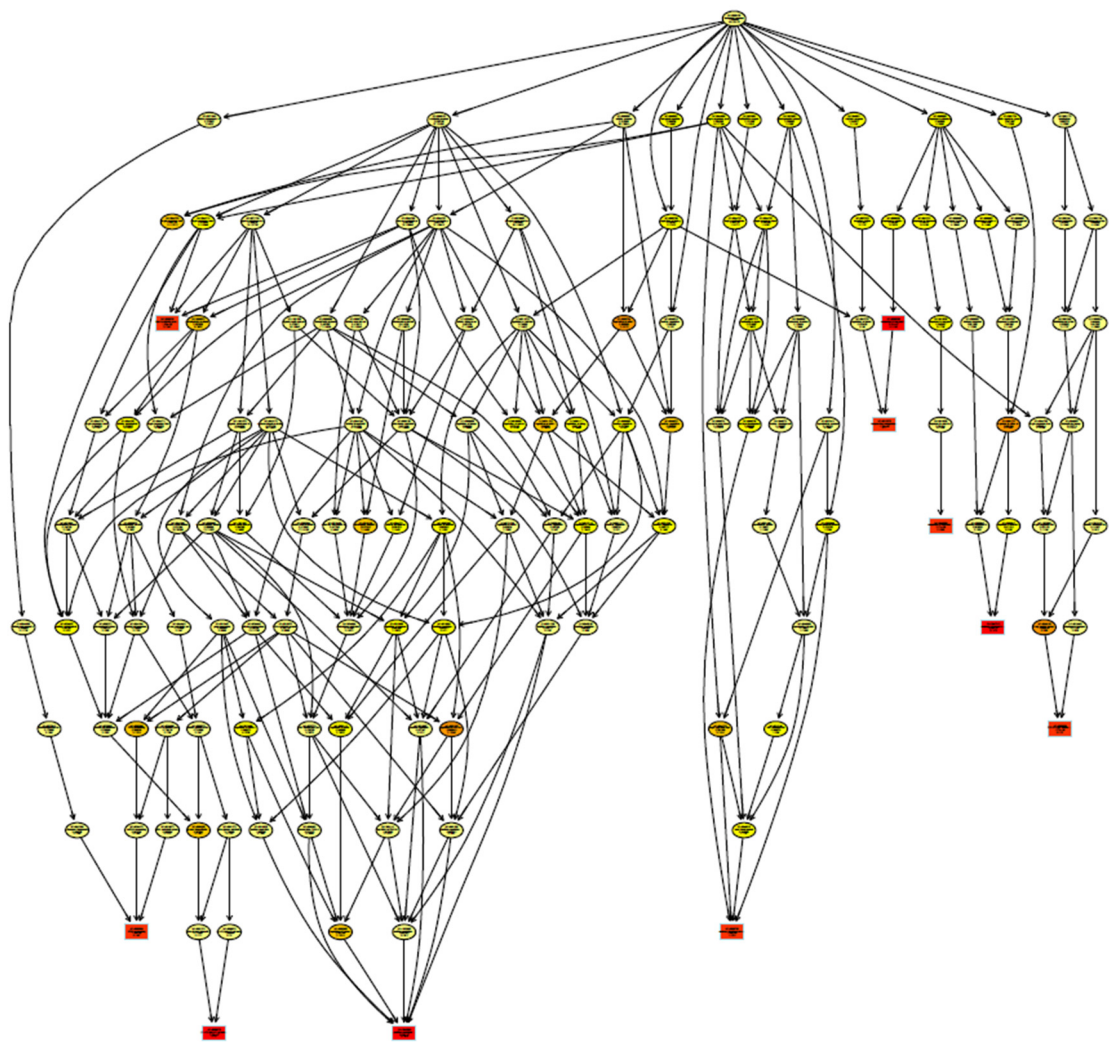

Figure S2: TopGO analysis of the genes locating at a region of  $\pm 10$  kb near to the significant SNPs for biological process in 2016

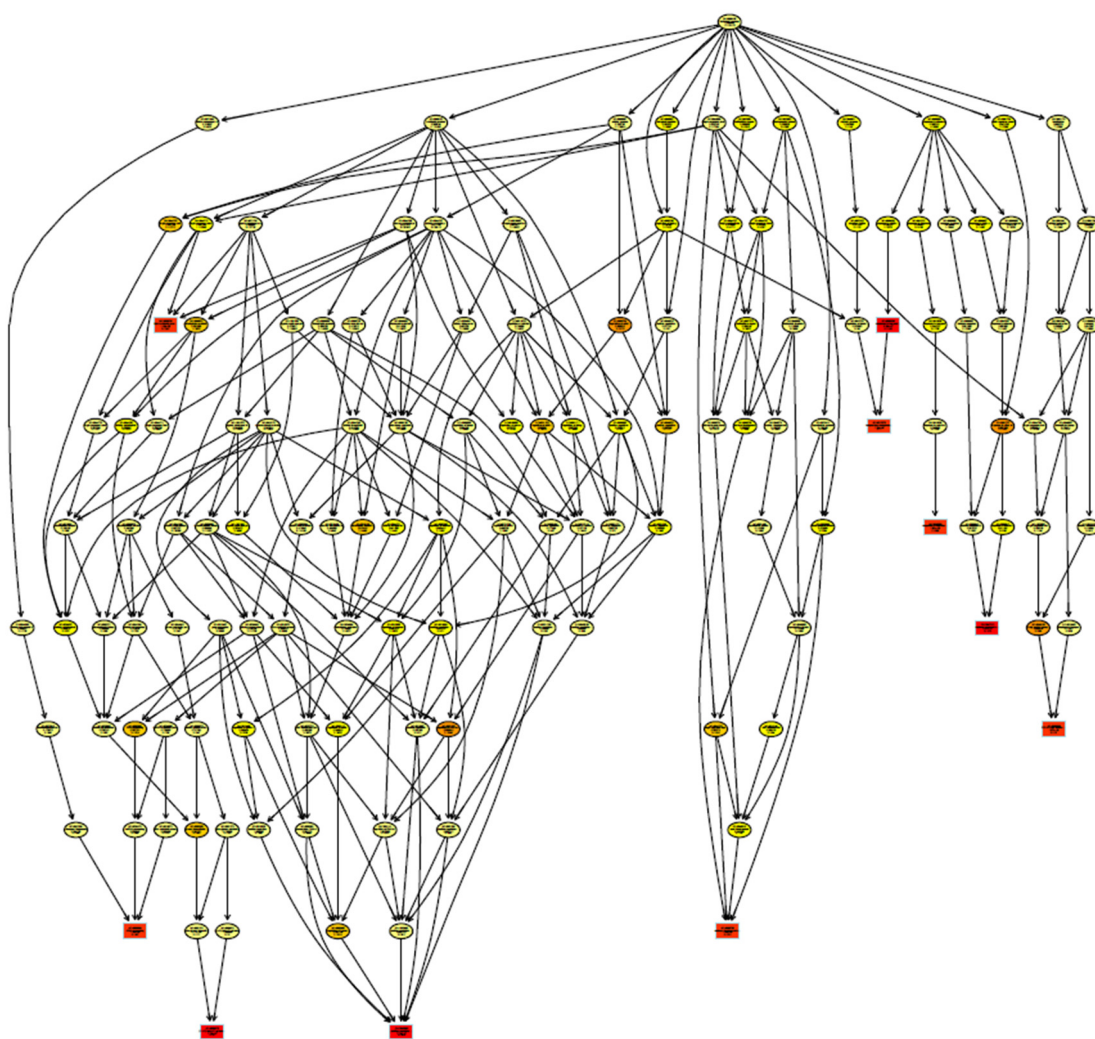

Figure S3: TopGO analysis of the genes locating at a region of  $\pm 10$  kb near to the significant SNPs for biological process in 2017

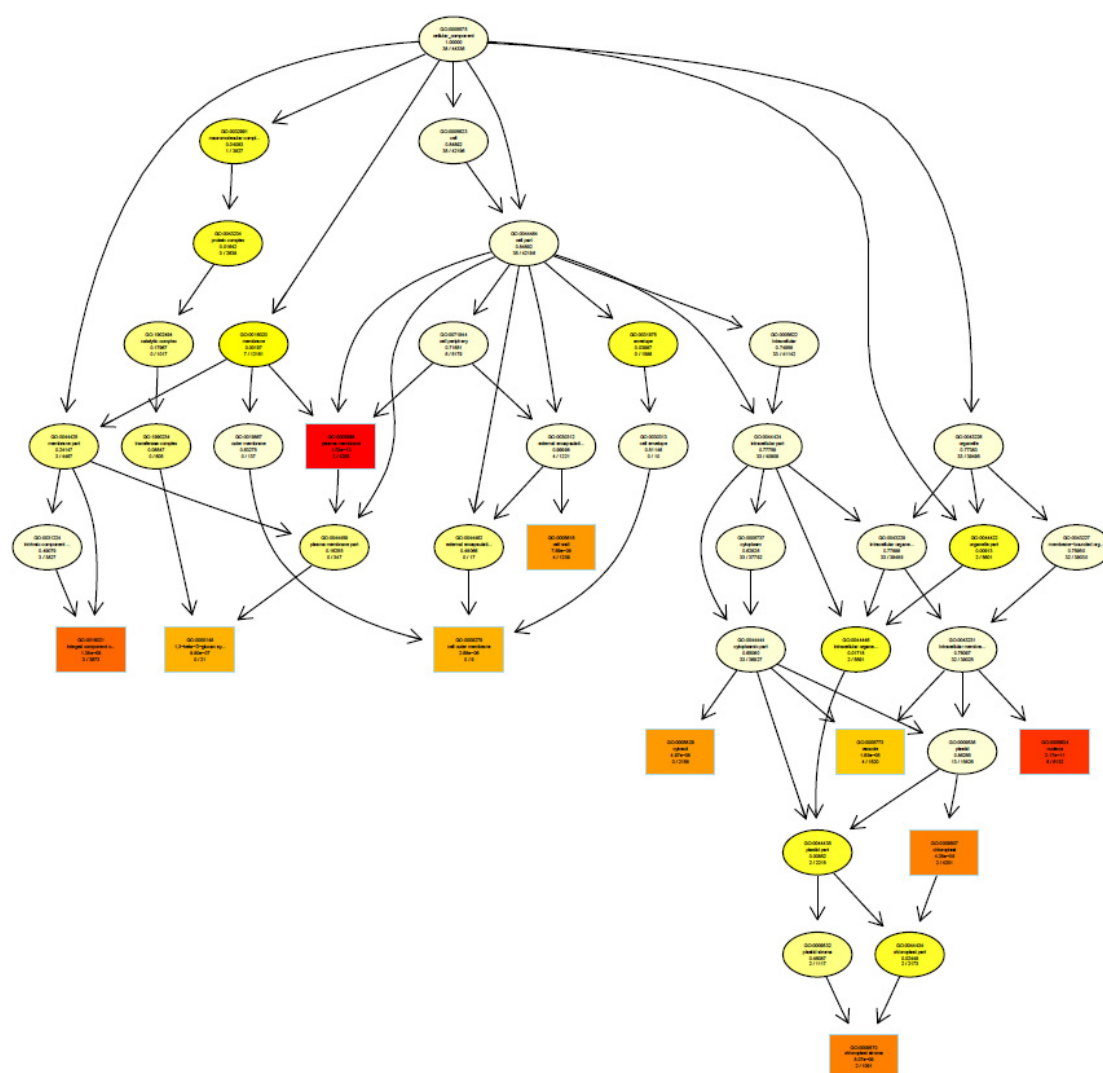

Figure S4: TopGO analysis of the genes locating at a region of  $\pm 10$  kb near to the significant SNPs for cellular component in 2016







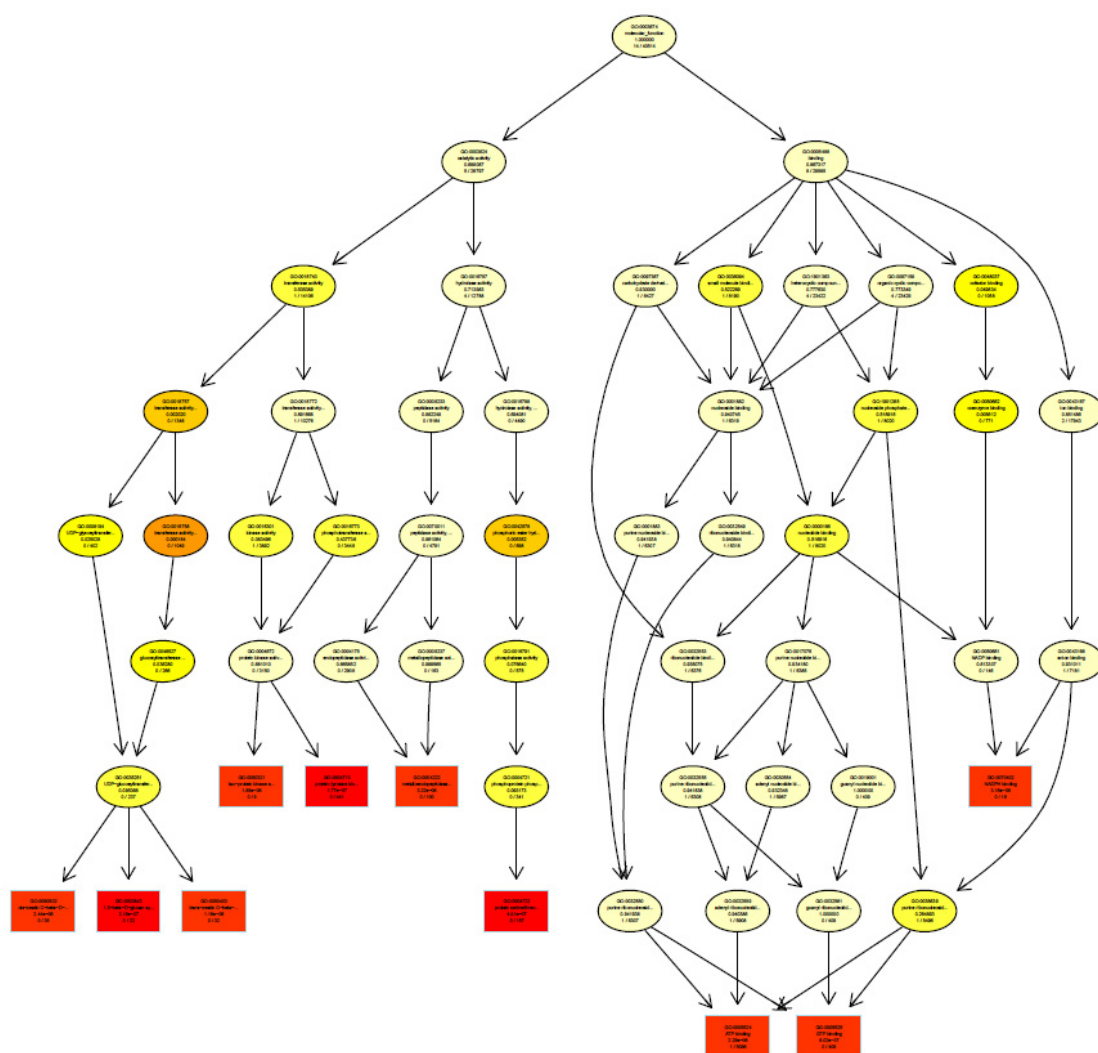

Figure S7: TopGO analysis of the genes locating at a region of  $\pm 10$  kb near to the significant SNPs for molecular function in 2017

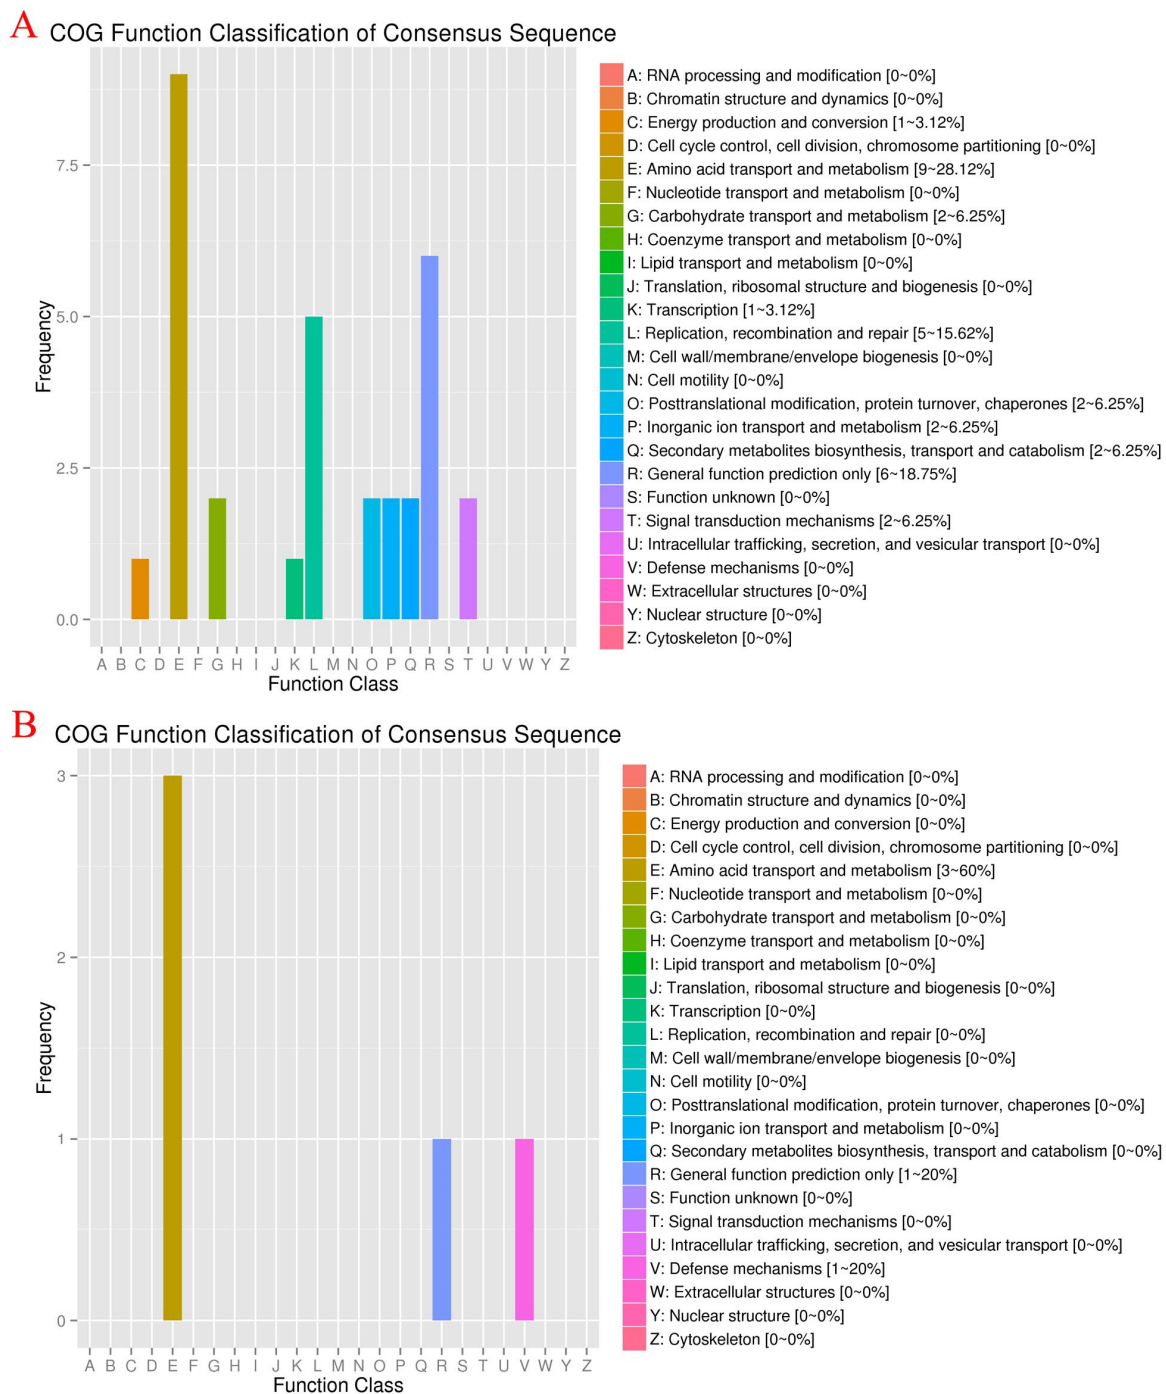

Figure S8: Cluster of orthologous groups of proteins (COG) function classification of the genes locating at a region of  $\pm 10$  kb near to the significant SNPs. A. 2016; B. 2017



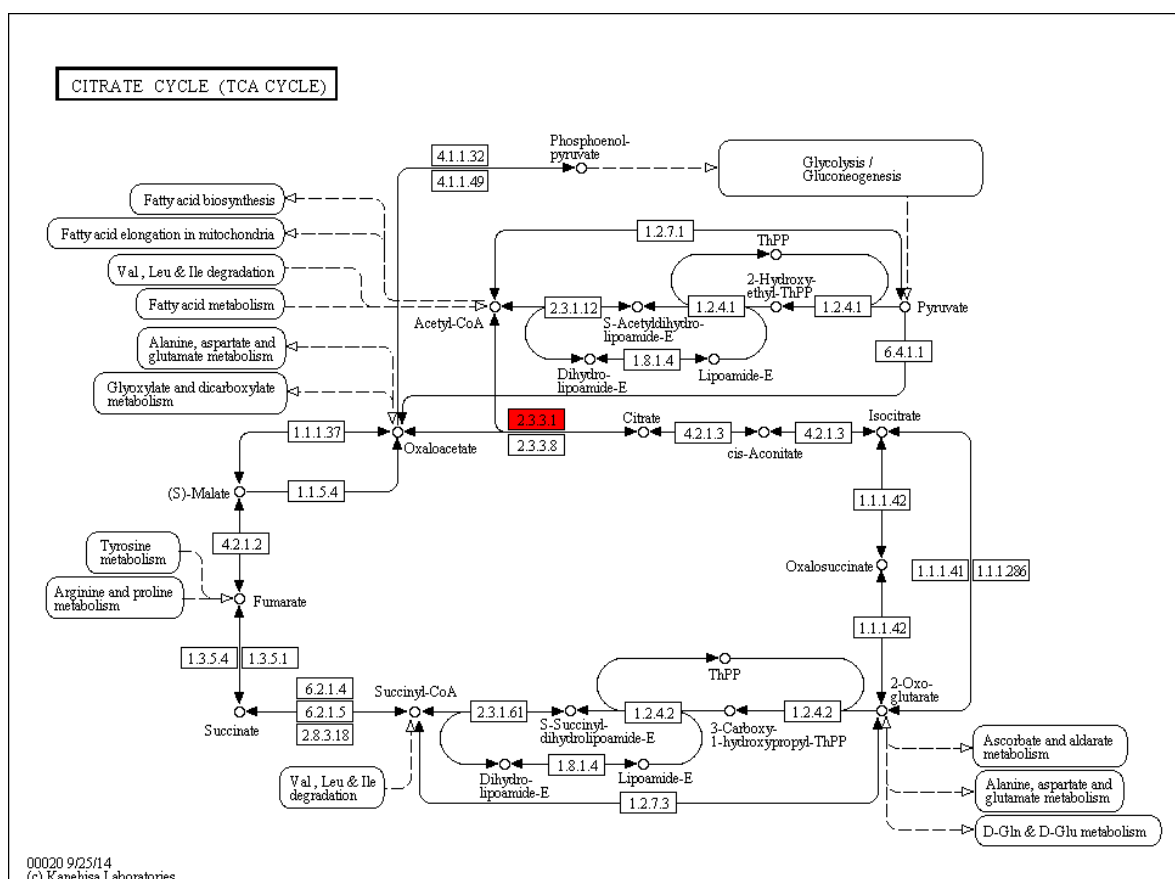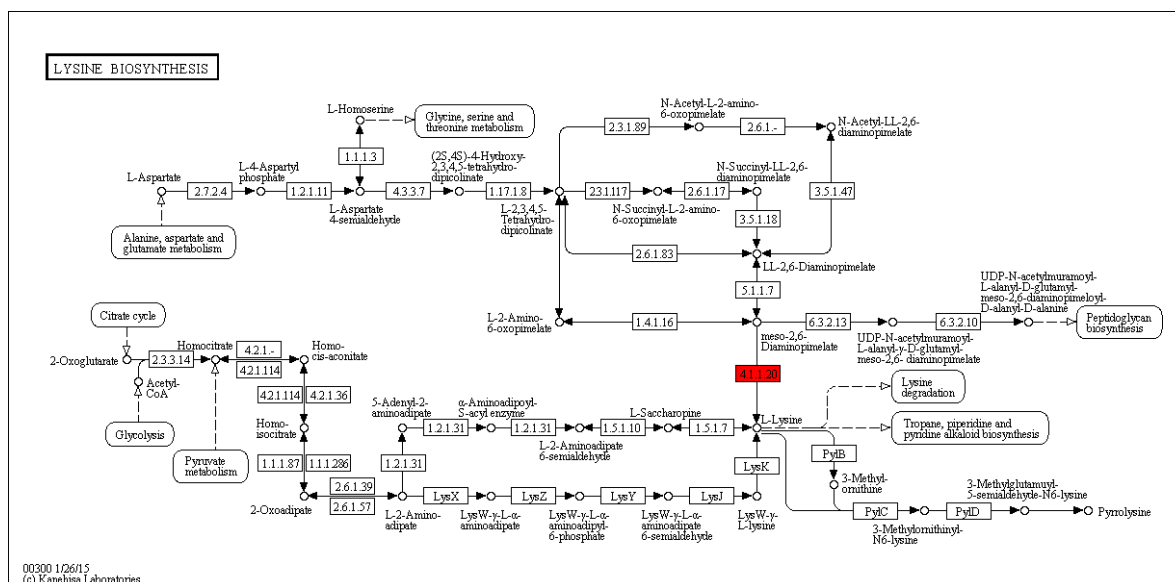

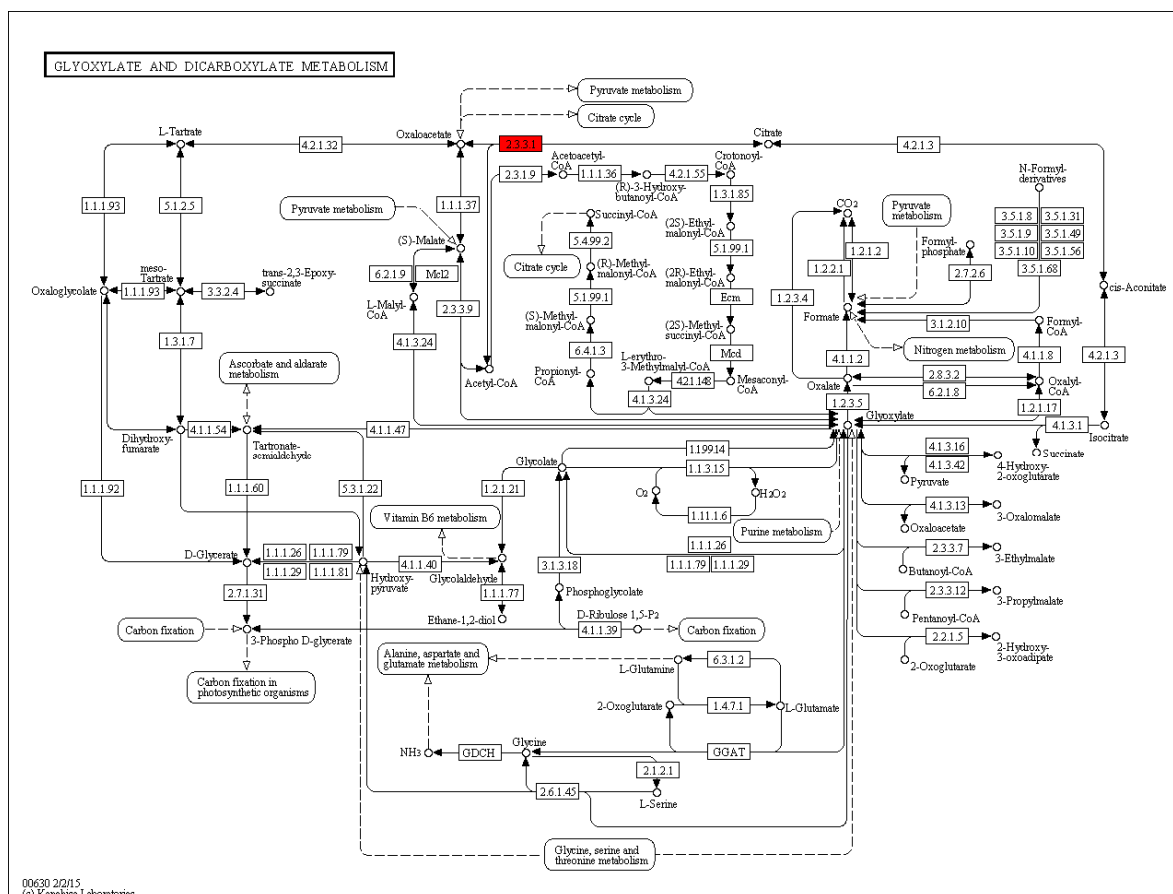

Figure S11: Glyoxylate and dicarboxylate metabolism pathway for the genes locating at a region of  $\pm 10$  kb near to the significant SNPs by the KEGG pathway database in 2016

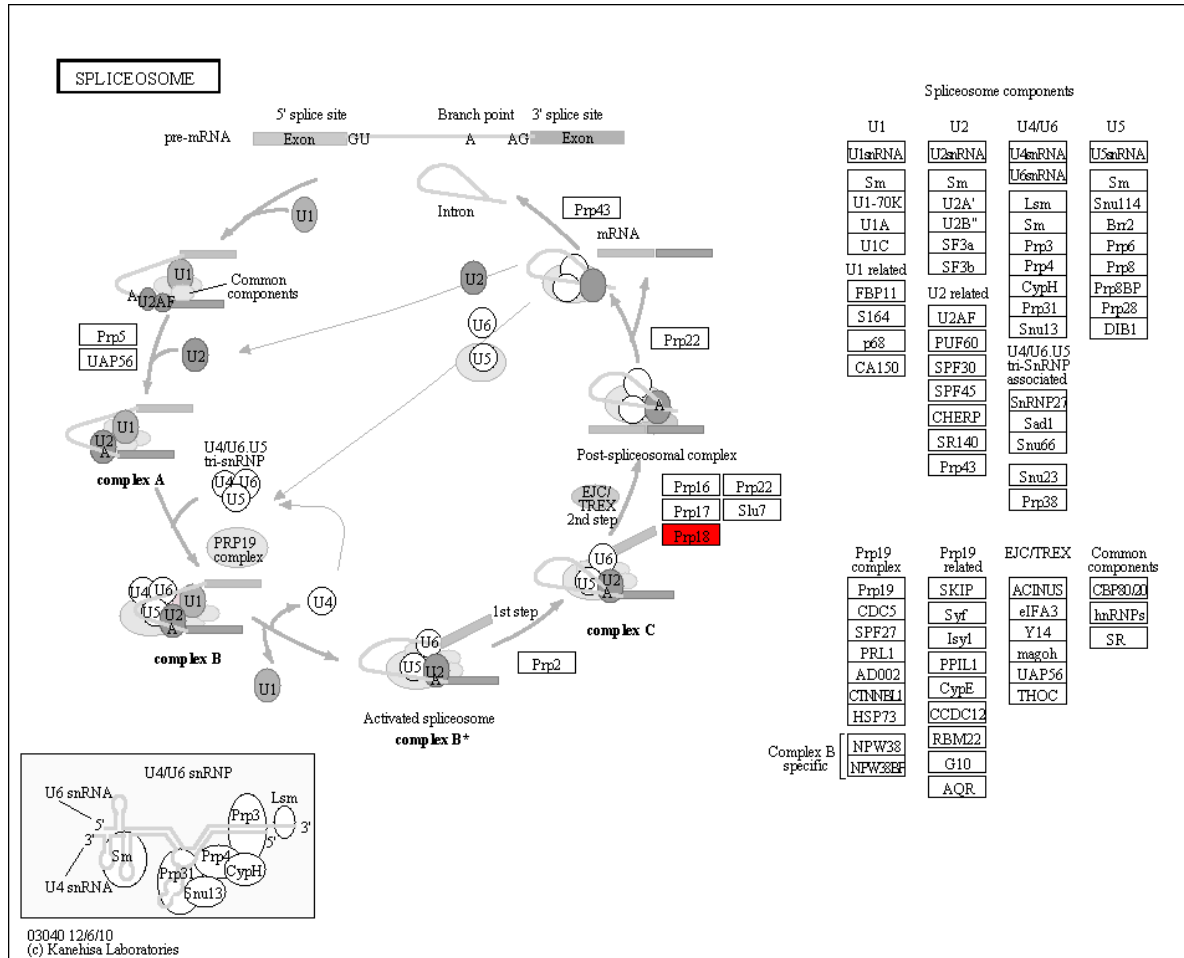

Figure S12: Spliceosome pathway for the genes locating at a region of  $\pm 10$  kb near to the significant SNPs by the KEGG pathway database in 2017

Table S1: Accessions, variety names, origin, germplasm types and ShB resistance of 150 rice varieties in Ting's core collection

| Acc. | Variety names      | Origin               | Indica vs. Japonica | Lesion length/plant height |             | Acc. | Variety names             | Origin        | Indica vs. Japonica | Lesion length/plant height |             |
|------|--------------------|----------------------|---------------------|----------------------------|-------------|------|---------------------------|---------------|---------------------|----------------------------|-------------|
|      |                    |                      |                     | 2016                       | 2017        |      |                           |               |                     | 2016                       | 2017        |
| CC1  | Yin guang          | Japan                | J                   | 0.024±0.0010               | 0.288±0.064 | CC7  | Guang ye hong mi          | South China   | I                   | 0.051±0.023                | 0.060±0.030 |
| CC2  | Ao guo 5-B         | Japan                | J                   | missing                    | missing     | CC7  | Da nuo                    | South China   | I                   | 0.056±0.059                | 0.174±0.024 |
| CC3  | Ai you             | Japan                | J                   | 0.040±0.0050               | 0.136±0.069 | CC7  | Bai xu                    | South China   | I                   | 0.038±0.034                | 0.078±0.024 |
| CC4  | Tie geng yi shi ao | Yangtze River region | J                   | missing                    | missing     | CC7  | Mao he                    | South China   | I                   | missing                    | missing     |
| CC5  | Guo zhu            | Japan                | J                   | 0.160±0.046                | 0.230±0.091 | CC8  | Xu zai                    | South China   | I                   | 0.057±0.015                | 0.054±0.005 |
| CC6  | Ben dao            | North China          | J                   | 0.118±0.014                | 0.193±0.008 | CC8  | Dong an hou zi pu xiao he | Central China | I                   | 0.033±0.031                | 0.074±0.012 |

|       |                             |                         |    |             |              |        |                      |                      |   |             |             |
|-------|-----------------------------|-------------------------|----|-------------|--------------|--------|----------------------|----------------------|---|-------------|-------------|
| CC 7  | Mang shui dao               | Yangtze River region    | J  | missing     | missing      | CC8 2  | Tie gu pao           | Central China        | I | 0.058±0.025 | 0.182±0.085 |
| CC 8  | Bai mang gao li han dao bai | North China             | J  | missing     | missing      | CC8 3  | Chi mao zhan         | South China          | I | 0.104±0.073 | 0.064±0.022 |
| CC 9  | Jiu yue han                 | Northeast China         | J  | 0.029±0.015 | 0.074±0.040  | CC8 4  | Hu bei zao           | Central China        | I | 0.085±0.046 | 0.145±0.020 |
| CC 10 | Bi jie ma wei hong gu       | Yunnan-Kweichow Plateau | J  | missing     | missing      | CC8 5  | Ya jing mi           | South China          | I | 0.156±0.194 | 0.192±0.033 |
| CC 11 | Ai da tou                   | Yangtze River region    | J  | missing     | missing      | CC8 6  | Ba shi zi            | Central China        | I | 0.068±0.028 | 0.067±0.036 |
| CC 12 | Gui zao bai he              | Yangtze River region    | J  | 0.238±0.078 | 0.1415±0.048 | CC8 7  | Dong jun zi          | Central China        | I | missing     | missing     |
| CC 13 | Xiang dao                   | North China             | J  | 0.050±0.016 | 0.054±0.022  | CC8 8  | Early pradifice      | Unknown              | I | 0.024±0.010 | 0.031±0.008 |
| CC 14 | Zi jin gu                   | Northeast China         | J  | 0.071±0.009 | 0.057±0.029  | CC8 9  | Nuo                  | South China          | I | 0.044±0.018 | 0.076±0.019 |
| CC 15 | Xiang chuan                 | Japan                   | J  | missing     | missing      | CC9 0  | Gui zhao he 2        | Japan                | I | missing     | missing     |
| CC 16 | Nagabo                      | Taiwan                  | J  | 0.109±0.057 | 0.060±0.003  | CC9 1  | Hei nuo              | Unknown              | I | 0.401±0.569 | 0.110±0.014 |
| CC 17 | Bai ke da nuo               | South China             | J  | 0.022±0.024 | 0.063±0.010  | CC9 2  | Da yi mao            | Central China        | I | 0.028±0.034 | 0.055±0.019 |
| CC 18 | San pai zhong               | South China             | J  | 0.266±0.036 | 0.1045±0.024 | CC9 3  | Gai cao zhan         | Central China        | I | 0.070±0.052 | 0.088±0.063 |
| CC 19 | Kai xuan                    | Japan                   | J  | 0.118±0.062 | 0.054±0.022  | CC9 4  | Gamal                | Unknown              | I | missing     | missing     |
| CC 20 | Shi ban zhan                | North China             | J  | 0.034±0.024 | 0.054±0.005  | CC9 5  | Bu gou wei           | South China          | I | 0.073±0.024 | 0.104±0.060 |
| CC 21 | Hei ke da nuo               | South China             | J  | 0.120±0.093 | 0.253±0.090  | CC9 6  | Bai ke xi nuo        | South China          | I | 0.058±0.041 | 0.104±0.009 |
| CC 22 | Shen shui wan dao           | Yangtze River region    | AD | 0.158±0.060 | 0.061±0.040  | CC9 7  | Ben dao              | North China          | I | 0.118±0.114 | 0.193±0.008 |
| CC 23 | Hong ben dao                | Yangtze River region    | AD | 0.154±0.044 | 0.351±0.058  | CC9 8  | Ba xian shu          | Japan                | I | 0.065±0.020 | 0.056±0.022 |
| CC 24 | Duan mang zi jin gu         | Northeast China         | AD | 0.080±0.025 | 0.043±0.034  | CC9 9  | Guang hong mi dao    | Yangtze River region | I | 0.005±0.007 | 0.124±0.032 |
| CC 25 | Bei jing jiang mi           | North China             | AD | 0.134±0.090 | 0.047±0.022  | CC1 00 | Wu mang yan guo qing | North China          | I | 0.009±0.008 | 0.122±0.033 |
| CC 26 | Daeri                       | Celebes                 | AD | 0.249±0.010 | 0.056±0.024  | CC1 01 | Chang xu nuo         | South China          | I | 0.094±0.072 | 0.162±0.044 |
| CC 27 | Jian tou nuo                | South China             | AD | 0.032±0.015 | 0.037±0.012  | CC1 02 | Jiang wan 15         | Central China        | I | 0.074±0.075 | 0.080±0.025 |
| CC 28 | Long you man dao            | Yangtze River region    | AD | missing     | missing      | CC1 03 | Bai hua er           | South China          | I | 0.054±0.036 | 0.085±0.054 |
| CC 29 | Kun shan zhu zhou dao       | Yangtze River region    | AD | 0.038±0.015 | 0.145±0.021  | CC1 04 | Liu chang xian       | South China          | I | 0.079±0.006 | 0.093±0.014 |
| CC 30 | Huang ke zao 2              | Yangtze River region    | AD | 0.006±0.008 | 0.109±0.035  | CC1 05 | Bai yin 3            | South China          | I | 0.065±0.014 | 0.084±0.020 |
| CC 31 | Sheng fang da bai gu        | North China             | AD | 0.044±0.058 | 0.244±0.075  | CC1 06 | Shui zao huang pi    | South China          | I | 0.062±0.026 | 0.158±0.096 |

|       |                        |                         |          |              |                |        |                              |               |          |              |               |
|-------|------------------------|-------------------------|----------|--------------|----------------|--------|------------------------------|---------------|----------|--------------|---------------|
| CC 32 | Xiao dou               | Japan                   | AD       | 0.039±0.0034 | 0.054±0.002    | CC1 07 | Yin 2 dong 7                 | South China   | <i>I</i> | 0.045±0.0024 | 0.087±0.0046  |
| CC 33 | Poetih                 | Celebes                 | AD       | missing      | missing        | CC1 08 | Hou ma                       | South China   | <i>I</i> | 0.168±0.0234 | 0.047±0.0010  |
| CC 34 | Tebaro                 | Sumbawa                 | AD       | 0.045±0.0015 | 0.126±0.0011   | CC1 09 | Dong zhu 2                   | South China   | <i>I</i> | 0.001±0.0001 | 0.074±0.0018  |
| CC 35 | Ao hua da gui tou hong | Yangtze River region    | AD       | 0.152±0.0097 | 0.234±0.0070   | CC1 10 | Hong gen da mi               | South China   | <i>I</i> | 0.059±0.0073 | 0.090±0.0048  |
| CC 36 | Hui bei zi             | Yunnan-Kweichow Plateau | AD       | 0.074±0.0085 | 0.074±0.0045   | CC1 11 | Ben cheng guan yin zhan      | Central China | <i>I</i> | 0.050±0.0060 | 0.076±0.0018  |
| CC 37 | Ba shi zi              | Yangtze River region    | AD       | 0.068±0.0028 | 0.067±0.0037   | CC1 12 | Xi miao gu                   | South China   | <i>I</i> | 0.024±0.0008 | 0.058±0.0005  |
| CC 38 | Zao sheng da ye        | Japan                   | AD       | 0.043±0.0042 | 0.077±0.0064   | CC1 13 | 186-zao guan yin zhan        | Central China | <i>I</i> | 0.046±0.0004 | 0.157±0.0027  |
| CC 39 | Bnlastog               | Low latitude region     | <i>I</i> | 0.097±0.0057 | 0.185±0.0042   | CC1 14 | Chang mang hei ma zao        | Yunnan        | <i>I</i> | 0.054±0.0012 | 0.252±0.0021  |
| CC 40 | Nuo mi                 | North China             | <i>I</i> | 0.060±0.0025 | 0.048±0.0007   | CC1 15 | Shui tian zhan gu nuo        | South China   | <i>I</i> | 0.084±0.0059 | 0.183±0.0059  |
| CC 41 | Xi chuan huang liu     | South China             | <i>I</i> | 0.084±0.0028 | 0.107±0.0020   | CC1 16 | Chang han da hua ke          | South China   | <i>I</i> | 0.048±0.0042 | 0.248±0.00189 |
| CC 42 | Hei ju dao             | Yangtze River region    | <i>I</i> | 0.095±0.0068 | 0.169±0.0091   | CC1 17 | Da he                        | South China   | <i>I</i> | 0.098±0.0111 | 0.176±0.0072  |
| CC 43 | Guang ful              | Taiwan                  | <i>I</i> | 0.127±0.0012 | 0.132±0.0058   | CC1 18 | Zeng cheng hei nuo           | South China   | <i>I</i> | missing      | missing       |
| CC 44 | Zhong qi jia qing      | Yangtze River region    | <i>I</i> | 0.108±0.0016 | 0.197±0.0014   | CC1 19 | Mao he                       | South China   | <i>I</i> | missing      | missing       |
| CC 45 | III-49-4xi chuan huang | Taiwan                  | <i>I</i> | 0.104±0.0025 | 0.057±0.0029   | CC1 20 | Bai gu zhan                  | Central China | <i>I</i> | 0.085±0.0047 | 0.053±0.0009  |
| CC 46 | Xin xian li            | Yangtze River region    | <i>I</i> | missing      | missing        | CC1 21 | Die zhi                      | South China   | <i>I</i> | 0.084±0.0011 | 0.083±0.0052  |
| CC 47 | Da liu tiao dao        | Yangtze River region    | <i>I</i> | 0.035±0.0045 | 0.062±0.0024   | CC1 22 | You zhan                     | South China   | <i>I</i> | 0.034±0.0004 | 0.041±0.0009  |
| CC 48 | Bai ke                 | South China             | <i>I</i> | missing      | missing        | CC1 23 | Chang sha wu qu wan dao      | Central China | <i>I</i> | 0.046±0.0026 | 0.134±0.0009  |
| CC 49 | Chuan chi 1            | Central China           | <i>I</i> | 0.035±0.0025 | 0.158±0.0046   | CC1 24 | Tong ling hu nan xian        | Central China | <i>I</i> | 0.028±0.0026 | 0.047±0.0014  |
| CC 50 | Tai nong 46            | Taiwan                  | <i>I</i> | 0.201±0.0040 | 0.088±0.0016   | CC1 25 | Xiao mao dao                 | Central China | <i>I</i> | 0.033±0.0028 | 0.072±0.0028  |
| CC 51 | Ba chong sui           | Japan                   | <i>I</i> | 0.062±0.0035 | 0.045±0.0009   | CC1 26 | Jing xian si qu er gan       | Central China | <i>I</i> | 0.027±0.0010 | 0.075±0.0016  |
| CC 52 | Yun nan bai            | Central China           | <i>I</i> | 0.046±0.0078 | 0.030±0.0022   | CC1 27 | Zi xing er qu si dou xu      | Central China | <i>I</i> | 0.027±0.0028 | 0.158±0.00146 |
| CC 53 | Liao yang ben di 4     | Northeast China         | <i>I</i> | 0.016±0.0014 | 0.243±0.0049   | CC1 28 | Chen hui fu dao              | Central China | <i>I</i> | 0.073±0.0090 | 0.094±0.0025  |
| CC 54 | You zhan hong          | South China             | <i>I</i> | missing      | missing        | CC1 29 | Bai gan zi                   | Central China | <i>I</i> | 0.232±0.0122 | 0.084±0.0056  |
| CC 55 | Hei nuo                | South China             | <i>I</i> | 0.401±0.0069 | 0.50111±0.0015 | CC1 30 | Han lu wei zhan              | Central China | <i>I</i> | 0.016±0.0016 | 0.175±0.00152 |
| CC 56 | Xian zi zhan           | Central China           | <i>I</i> | 0.044±0.0050 | 0.111±0.0070   | CC1 31 | Xin hua san qu tang mao zhan | Central China | <i>I</i> | 0.023±0.0016 | 0.048±0.0009  |

|          |                                  |                                |          |             |             |           |                                  |                  |          |             |             |
|----------|----------------------------------|--------------------------------|----------|-------------|-------------|-----------|----------------------------------|------------------|----------|-------------|-------------|
| CC<br>57 | Da tou meng                      | Central China                  | <i>I</i> | missing     | missing     | CC1<br>32 | Ta gu zhan                       | Central<br>China | <i>I</i> | 0.110±0.026 | 0.082±0.018 |
| CC<br>58 | Chi bai gan<br>zhan              | Central China                  | <i>I</i> | 0.080±0.022 | 0.255±0.064 | CC1<br>33 | Mian tiao zhan                   | Central<br>China | <i>I</i> | 0.035±0.006 | 0.094±0.032 |
| CC<br>59 | Zeng cheng<br>xiang shan<br>zhan | South China                    | <i>I</i> | 0.033±0.056 | 0.122±0.022 | CC1<br>34 | Hu guang zhan                    | Central<br>China | <i>I</i> | 0.128±0.109 | 0.289±0.173 |
| CC<br>60 | Cang wu shan<br>he zhan          | South China                    | <i>I</i> | 0.045±0.041 | 0.029±0.015 | CC1<br>35 | Jiang an da ye<br>zao            | Central<br>China | <i>I</i> | 0.014±0.022 | 0.042±0.015 |
| CC<br>61 | Da gu zao                        | South China                    | <i>I</i> | 0.066±0.058 | 0.138±0.019 | CC1<br>36 | Tie ban zhan                     | Central<br>China | <i>I</i> | missing     | missing     |
| CC<br>62 | Jie yang dong<br>liao zhong      | South China                    | <i>I</i> | 0.073±0.025 | 0.083±0.041 | CC1<br>37 | Da gu zao                        | Central<br>China | <i>I</i> | 0.060±0.058 | 0.251±0.216 |
| CC<br>63 | Nan xiong ku<br>gua zao          | South China                    | <i>I</i> | 0.068±0.046 | 0.110±0.043 | CC1<br>38 | Ding nan dong<br>zhan            | Central<br>China | <i>I</i> | 0.088±0.014 | 0.180±0.059 |
| CC<br>64 | Chang mang                       | South China                    | <i>I</i> | 0.026±0.006 | 0.074±0.022 | CC1<br>39 | Lao wu gu                        | Central<br>China | <i>I</i> | 0.049±0.019 | 0.244±0.128 |
| CC<br>65 | Mandi                            | Celebes                        | <i>I</i> | 0.278±0.038 | 0.165±0.057 | CC1<br>40 | Xin ban chang<br>ke zi           | Central<br>China | <i>I</i> | missing     | missing     |
| CC<br>66 | Bai gu                           | South China                    | <i>I</i> | missing     | missing     | CC1<br>41 | Bai zhan gu                      | Central<br>China | <i>I</i> | missing     | missing     |
| CC<br>67 | Hong zao gu                      | Yunnan-<br>Kweichow<br>Plateau | <i>I</i> | 0.037±0.017 | 0.148±0.030 | CC1<br>42 | Si chuan zhan                    | Central<br>China | <i>I</i> | missing     | missing     |
| CC<br>68 | Cang wu shan<br>he zhan          | South China                    | <i>I</i> | 0.045±0.041 | 0.029±0.015 | CC1<br>43 | Gao jiao gui hua                 | Central<br>China | <i>I</i> | missing     | missing     |
| CC<br>69 | Zao die zhan<br>gu               | Central China                  | <i>I</i> | 0.016±0.010 | 0.216±0.031 | CC1<br>44 | Chang shu wu<br>wi dao           | Central<br>China | <i>I</i> | missing     | missing     |
| CC<br>70 | Su zhou zhan                     | Central China                  | <i>I</i> | missing     | missing     | CC1<br>45 | Da nuo bai dong                  | Central<br>China | <i>I</i> | 0.132±0.052 | 0.199±0.125 |
| CC<br>71 | Yang zhan 3                      | South China                    | <i>I</i> | 0.040±0.012 | 0.083±0.027 | CC1<br>46 | Lin chuan da ye<br>zao           | South<br>China   | <i>I</i> | 0.020±0.017 | 0.069±0.016 |
| CC<br>72 | Luo ding zhan<br>1               | South China                    | <i>I</i> | missing     | missing     | CC1<br>47 | Da bai cao                       | North<br>China   | <i>I</i> | 0.040±0.044 | 0.047±0.022 |
| CC<br>73 | Gen yin 29                       | South China                    | <i>I</i> | 0.012±0.018 | 0.062±0.014 | CC1<br>48 | Chang ning wu<br>qu nan tou zhan | Central<br>China | <i>I</i> | 0.058±0.019 | 0.034±0.018 |
| CC<br>74 | Wu ke nuo                        | South China                    | <i>I</i> | missing     | missing     | CC1<br>49 | Pi xian da ye zi                 | Central<br>China | <i>I</i> | 0.034±0.013 | 0.042±0.004 |
| CC<br>75 | Hua bai ke                       | South China                    | <i>I</i> | missing     | missing     | CC1<br>50 | Xi zi zhan                       | Central<br>China | <i>I</i> | missing     | missing     |
